# Supplementary material for: Revised Approach to the Role of Fatigue in Anterior Cruciate Ligament Injury Prevention: A Systematic Review with Meta-Analyses
Source: PubMed Central journal article supplement (PMC6422960; doi:10.1007/s40279-019-01052-6), 2019-01-18
Supplement: 40279_2019_1052_MOESM2_ESM.pdf [file 40279_2019_1052_MOESM2_ESM.pdf]

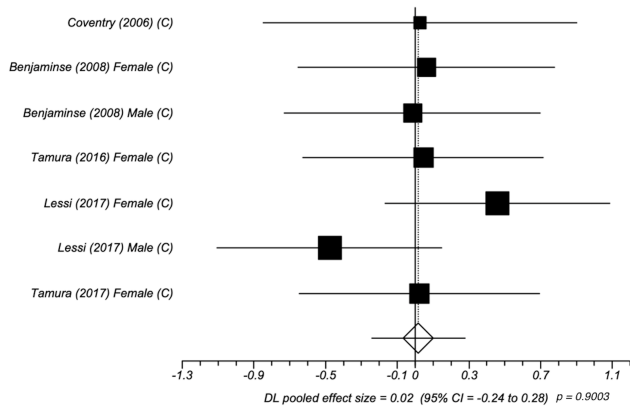

**Single-leg drop vertical jump**

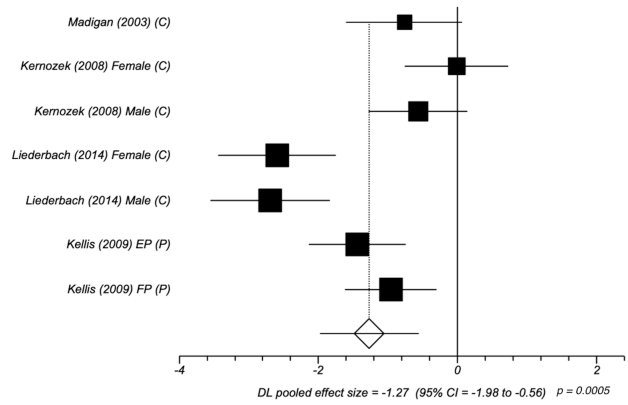

**Single-leg drop landing**

**Fig. S2** Pooled effects of fatigue on peak knee flexion angle (left = increased post fatigue; right = decreased post fatigue; C = central fatigue protocol; P = peripheral fatigue protocol; EP = extension protocol; FP = flexion protocol)
