# Supplementary material for: Revised Approach to the Role of Fatigue in Anterior Cruciate Ligament Injury Prevention: A Systematic Review with Meta-Analyses
Source: PubMed Central journal article supplement (PMC6422960; doi:10.1007/s40279-019-01052-6), 2019-01-18
Supplement: 40279_2019_1052_MOESM3_ESM.pdf [file 40279_2019_1052_MOESM3_ESM.pdf]

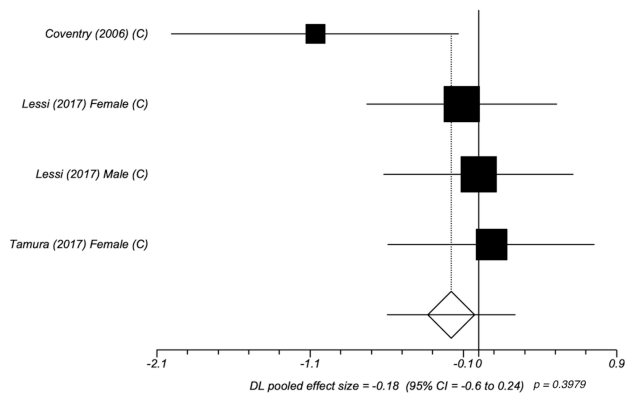

**Single-leg drop vertical jump**

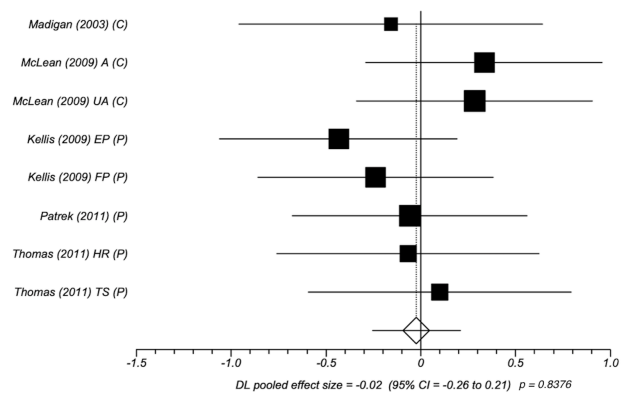

**Single-leg drop landing**

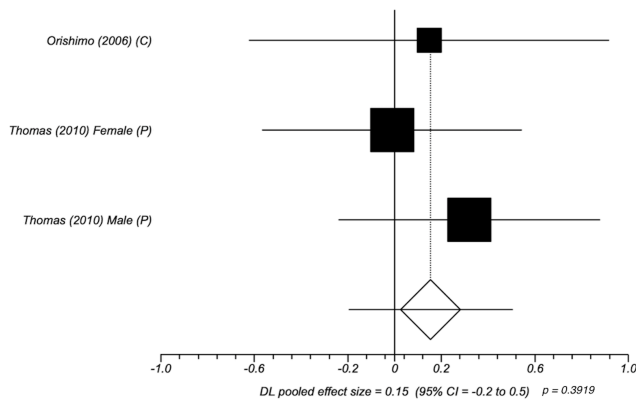

**Single-leg hop for distance**

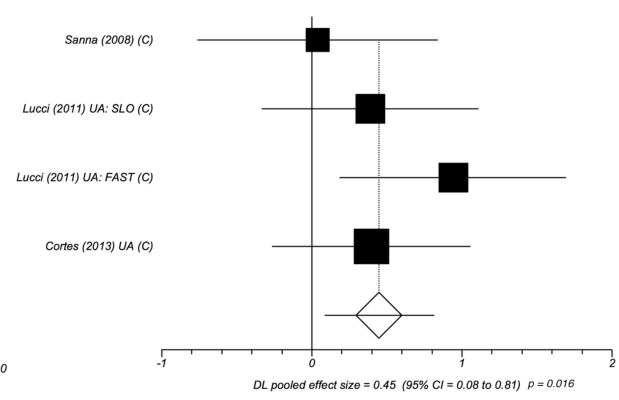

**Sidestep cutting**

**Fig. S3** Pooled effects of fatigue on hip flexion angle at initial contact (left = increased post fatigue; right = decreased post fatigue; **C** = **central** fatigue protocol; **P** = **peripheral** fatigue protocol; EP = extension protocol; FP = flexion protocol; HR = hip rotators fatigue protocol; TS = triceps surae fatigue protocol; FAST = functional agility short-term fatigue protocol; SLO = slow linear oxidative fatigue protocol; UA = unanticipated)
